# Supplementary material for: Role of molecular symmetry in the magnetic relaxation dynamics of five-coordinate Dy(iii) complexes
Source: Royal Society of Chemistry journal article supplement (doi:10.1039/d3dt00095h), 2023-01-01
Supplement: d3dt00095h1.pdf [file d3dt00095h1.pdf]

# Supporting Information

## **Role of Molecular Symmetry on the Magnetic Relaxation Dynamics of Five-Coordinate Dy(III) Complexes**

Yan Guo<sup>†a,b</sup>, Kang Liu<sup>†,a</sup>, Yuanyuan Qin<sup>†,b</sup>, Qun-Yan Wu<sup>a</sup>, Kong-Qiu Hu<sup>a</sup>, Lei Mei<sup>a</sup>,  
Zhi-Fang Chai,<sup>a</sup> Xiang-Yu Liu<sup>\*,b</sup>, Ji-Pan Yu<sup>\*,a</sup> and Wei-Qun Shi<sup>\*,a</sup>

<sup>a</sup>Laboratory of Nuclear Energy Chemistry, Institute of High Energy Physics, Chinese Academy of Sciences, Beijing, 100049, China

<sup>b</sup>State Key Laboratory of High-efficiency Utilization of Coal and Green Chemical Engineering, College of Chemistry and Chemical Engineering, Ningxia University, Yinchuan 750021, China.

## Table of Contents

|                                                                                                                                                                                                                                                                         |    |
|-------------------------------------------------------------------------------------------------------------------------------------------------------------------------------------------------------------------------------------------------------------------------|----|
| <b>Table S1</b> Selected crystallographic data and structure refinement for complexes <b>1-3</b> .....                                                                                                                                                                  | 3  |
| <b>Table S2</b> Selected Bond Lengths (Å) and Bond Angles (°) for <b>1-3</b> .....                                                                                                                                                                                      | 4  |
| <b>Table S3</b> Relaxation fitting parameters from least-squares fitting of $\chi(f)$ data under 500 Oe dc field of <b>1</b> .....                                                                                                                                      | 6  |
| <b>Table S4</b> Relaxation fitting parameters from least-squares fitting of $\chi(f)$ data under 500 Oe dc field of <b>2</b> .....                                                                                                                                      | 6  |
| <b>Table S5</b> Relaxation fitting parameters from least-squares fitting of $\chi(f)$ data under 500 Oe dc field of <b>3</b> .....                                                                                                                                      | 6  |
| <b>Table S6</b> Calculated energy levels ( $\text{cm}^{-1}$ ), $\mathbf{g}$ ( $g_x, g_y, g_z$ ) tensors and predominant $m_J$ values of the lowest eight Kramers doublets (KDs) of complexes <b>1a, 1b, 2</b> and <b>3</b> , using CASSCF/RASSI-SO with OpenMolcas..... | 7  |
| <b>Table S7</b> Wave functions with definite projection of the total moment $ m_J\rangle$ for the lowest eight KDs of complexes <b>1a, 1b, 2</b> and <b>3</b> using CASSCF/RASSI-SO with OpenMolcas.....                                                                | 8  |
| <b>Table S8</b> Calculated crystal-field parameters $B(k, q)$ and the corresponding weights for compounds <b>1a, 1b, 2</b> and <b>3</b> using CASSCF/RASSI-SO with OpenMolcas. ....                                                                                     | 9  |
| <b>Table S9</b> Continuous Shape Measures ( <i>CShM</i> ) calculations for complexes <b>1-3</b> .....                                                                                                                                                                   | 10 |
| <b>Table S10</b> Crystal field parameters for <b>1-3</b> fitted from magnetic data.....                                                                                                                                                                                 | 11 |
| <b>Table S11</b> Energy levels and $\mathbf{g}$ for <b>1-3</b> fitted from magnetic data.....                                                                                                                                                                           | 11 |
| <b>Fig. S1</b> Packing arrangement of <b>1</b> along the crystallographic <i>b</i> axis. ....                                                                                                                                                                           | 11 |
| <b>Fig. S2</b> Packing arrangement of <b>2</b> along the crystallographic <i>a</i> axis. ....                                                                                                                                                                           | 12 |
| <b>Fig. S3</b> Packing arrangement of <b>3</b> along the crystallographic <i>a</i> axis. ....                                                                                                                                                                           | 12 |
| <b>Fig. S4</b> PXRD patterns for complex <b>1</b> . ....                                                                                                                                                                                                                | 13 |
| <b>Fig. S5</b> PXRD patterns for complex <b>2</b> . ....                                                                                                                                                                                                                | 13 |
| <b>Fig. S6</b> PXRD patterns for complex <b>3</b> . ....                                                                                                                                                                                                                | 14 |
| <b>Fig. S7</b> Plots of $M$ vs. $H/T$ for <b>1-3</b> at different temperature. ....                                                                                                                                                                                     | 14 |
| <b>Fig. S8</b> Temperature dependence of the in-phase (top) and out (bottom) ac susceptibilities at different frequencies without a dc field for complexes <b>1-3</b> .....                                                                                             | 14 |
| <b>Fig. S9</b> Frequency dependence of the in-phase (top) and out (bottom) ac susceptibilities at different frequencies without a dc field for complexes <b>1-3</b> . ....                                                                                              | 15 |
| <b>Fig. S10</b> Temperature dependence of the in-phase (top) and out-of-phase (bottom) ac susceptibilities at different frequencies with a dc field of 500 Oe for complexes <b>1</b> (a, a'), <b>2</b> (b, b') and <b>3</b> (c, c'). ...                                | 15 |
| <b>Fig. S11</b> Temperature dependent relaxation times of <b>1</b> (a), <b>2</b> (b) and <b>3</b> (c) (log-log scale) under a 500Oe dc field. The lines were fitted to the equation of $\tau = T^{-n}$ to give $n$ values. ....                                         | 16 |
| <b>Fig. S12</b> Calculated molecular structures of complexes <b>1a</b> (a), <b>1b</b> (b), <b>2</b> (c) and <b>3</b> (d); H atoms are omitted for clarify. ....                                                                                                         | 16 |
| <b>Fig. S13</b> Magnetization relaxation time, $\ln \tau$ vs. $T^{-1}$ plot under 500Oe dc field for <b>1</b> (a), <b>3</b> (b). The green line represents the Arrhenius fit. ....                                                                                      | 17 |
| <b>References</b> .....                                                                                                                                                                                                                                                 | 17 |

**Table S1** Selected crystallographic data and structure refinement for complexes **1-3**.

| Identification code                         | <b>1</b>                                                                                       | <b>2</b>                                                         | <b>3</b>                                                          |
|---------------------------------------------|------------------------------------------------------------------------------------------------|------------------------------------------------------------------|-------------------------------------------------------------------|
| Empirical formula                           | C <sub>68</sub> H <sub>106</sub> Dy <sub>2</sub> N <sub>8</sub> O <sub>2</sub> Si <sub>6</sub> | C <sub>35</sub> H <sub>50</sub> DyN <sub>5</sub> Si <sub>3</sub> | C <sub>33</sub> H <sub>54</sub> DyN <sub>5</sub> OSi <sub>3</sub> |
| Formula weight                              | 1561.14                                                                                        | 787.57                                                           | 783.58                                                            |
| Temperature/K                               | 150.0                                                                                          | 170                                                              | 170                                                               |
| Wavelength/Å                                | 0.71073                                                                                        | 1.54178                                                          | 0.71073                                                           |
| Crystal system                              | monoclinic                                                                                     | monoclinic                                                       | monoclinic                                                        |
| Space group                                 | <i>P</i> 2 <sub>1</sub>                                                                        | <i>P</i> 2 <sub>1</sub> / <i>c</i>                               | <i>P</i> 2 <sub>1</sub> / <i>c</i>                                |
| Unit cell dimensions                        | a = 10.0282(5) Å                                                                               | a = 15.7628(5) Å                                                 | a = 10.176(2) Å                                                   |
|                                             | b = 19.3323(9) Å                                                                               | b = 12.1123(4) Å                                                 | b = 19.387(6) Å                                                   |
|                                             | c = 19.4044(10) Å                                                                              | c = 19.7909(7) Å                                                 | c = 20.093(5) Å                                                   |
|                                             | α = 90°                                                                                        | α = 90°                                                          | α = 90°                                                           |
|                                             | β = 101.790(2)°                                                                                | β = 90.746(2)°                                                   | β = 102.988(9)°                                                   |
|                                             | γ = 90°                                                                                        | γ = 90°                                                          | γ = 90°                                                           |
| Volume/Å <sup>3</sup>                       | 3682.5(3)                                                                                      | 3776.8(2)                                                        | 3862.3(17)                                                        |
| Z                                           | 2                                                                                              | 4                                                                | 4                                                                 |
| Density (calculated)/g/cm <sup>3</sup>      | 1.408                                                                                          | 1.385                                                            | 1.348                                                             |
| Absorption coefficient/mm <sup>-1</sup>     | 2.158                                                                                          | 11.719                                                           | 2.058                                                             |
| F(000)                                      | 1604.0                                                                                         | 1612.0                                                           | 1612.0                                                            |
| Theta range for data collection             | 3.006 to 55.04°                                                                                | 5.61 to 136.88                                                   | 5.428 to 54.924                                                   |
| Index ranges                                | -13 ≤ h ≤ 13                                                                                   | -19 ≤ h ≤ 18                                                     | -13 ≤ h ≤ 13                                                      |
|                                             | -25 ≤ k ≤ 25                                                                                   | -14 ≤ k ≤ 14                                                     | -25 ≤ k ≤ 25                                                      |
|                                             | -25 ≤ l ≤ 25                                                                                   | -23 ≤ l ≤ 23                                                     | -26 ≤ l ≤ 26                                                      |
| Reflections collected                       | 76565                                                                                          | 40780                                                            | 86187                                                             |
| Independent reflections                     | 16866 [R <sub>int</sub> = 0.0556<br>R <sub>sigma</sub> = 0.0492]                               | 6905 [R <sub>int</sub> = 0.0470<br>R <sub>sigma</sub> = 0.0314]  | 8828 [R <sub>int</sub> = 0.0396<br>R <sub>sigma</sub> = 0.0181]   |
| Data/restraints/parameters                  | 16866/19/793                                                                                   | 6905/24/406                                                      | 8828/0/400                                                        |
| Goodness-of-fit on F <sup>2</sup>           | 1.036                                                                                          | 1.025                                                            | 1.078                                                             |
| Final R indexes [I ≥ 2σ (I)]                | R <sub>1</sub> = 0.0301<br>wR <sub>2</sub> = 0.0643                                            | R <sub>1</sub> = 0.0291<br>wR <sub>2</sub> = 0.0665              | R <sub>1</sub> = 0.0211<br>wR <sub>2</sub> = 0.0443               |
| Final R indexes [all data]                  | R <sub>1</sub> = 0.0365<br>wR <sub>2</sub> = 0.0666                                            | R <sub>1</sub> = 0.0394<br>wR <sub>2</sub> = 0.0716              | R <sub>1</sub> = 0.0255<br>wR <sub>2</sub> = 0.0459               |
| Largest diff. peak/hole / e Å <sup>-3</sup> | 1.14/-0.61                                                                                     | 0.73/-0.69                                                       | 0.47/-0.67                                                        |

**Table S2** Selected Bond Lengths (Å) and Bond Angles (°) for **1-3**.

| <b>Complex 1</b> |          |           |            |
|------------------|----------|-----------|------------|
| Dy1-O1           | 2.425(4) | O1-Dy1-N4 | 172.00(14) |
| Dy1-N4           | 2.499(5) | O1-Dy1-C8 | 101.97(15) |
| Dy1-N1           | 2.249(5) | N4-Dy1-C8 | 70.18(15)  |
| Dy1-C8           | 2.999(5) | N1-Dy1-O1 | 101.28(16) |
| Dy1-N3           | 2.249(4) | N1-Dy1-N4 | 83.95(16)  |
| Dy1-N2           | 2.263(5) | N1-Dy1-C8 | 135.05(16) |
| Dy2-N8           | 2.527(5) | N1-Dy1-N3 | 117.54(17) |
| Dy2-O2           | 2.409(5) | N1-Dy1-N2 | 114.39(17) |
| Dy2-N7           | 2.242(5) | N3-Dy1-O1 | 88.72(15)  |
| Dy2-N5           | 2.265(5) | N3-Dy1-N4 | 83.47(16)  |
| Dy2-N6           | 2.247(5) | N3-Dy1-C8 | 26.76(16)  |
| Si1-N1           | 1.719(5) | N3-Dy1-N2 | 124.50(17) |
| Si1-C30          | 1.865(7) | N2-Dy1-O1 | 99.38(16)  |
| Si1-C29          | 1.860(7) | N2-Dy1-N4 | 83.73(16)  |
| Si1-C31          | 1.888(7) | N2-Dy1-C8 | 99.01(16)  |
| Si6-N7           | 1.719(5) | O2-Dy2-N8 | 171.40(16) |
| Si6-C67          | 1.855(7) | N7-Dy2-N8 | 82.78(16)  |
| Si6-C66          | 1.861(7) | N7-Dy2-O2 | 102.63(16) |
| Si6-C68          | 1.887(8) | N7-Dy2-N5 | 115.50(17) |
| Si2-N2           | 1.720(5) | N7-Dy2-N6 | 116.39(17) |
| Si2-C33          | 1.890(7) | N5-Dy2-N8 | 83.44(18)  |
| Si2-C34          | 1.875(7) | N5-Dy2-O2 | 99.92(18)  |
| Si3-N3           | 1.714(5) | N6-Dy2-N8 | 82.89(17)  |
| Si5-N6           | 1.723(5) | N6-Dy2-O2 | 88.69(16)  |
| Si4-N5           | 1.707(5) | N6-Dy2-N5 | 123.75(18) |

  

| <b>Complex 2</b> |          |            |            |
|------------------|----------|------------|------------|
| Dy1-N3           | 2.253(3) | N3-Dy1-N4  | 83.90(9)   |
| Dy1-N4           | 2.500(2) | N3-Dy1-N1  | 118.59(10) |
| Dy1-N1           | 2.258(3) | N3-Dy1-N5  | 93.77(10)  |
| Dy1-N2           | 2.242(3) | N3-Dy1-C27 | 135.46(9)  |
| Dy1-N5           | 2.532(3) | N1-Dy1-N4  | 85.18(9)   |
| Si1-N1           | 1.715(3) | N1-Dy1-N5  | 100.86(10) |
| Si1-C29          | 1.875(4) | N1-Dy1-C27 | 26.77(9)   |
| Si1-C30          | 1.862(4) | N2-Dy1-N3  | 117.83(9)  |
| Si1-N2           | 1.718(3) | N2-Dy1-N4  | 83.20(9)   |
| Si2-C9           | 1.868(4) | N2-Dy1-N1  | 120.44(10) |
| Si2-C8           | 1.870(4) | N2-Dy1-N5  | 92.98(10)  |
| Si2-C10          | 1.867(4) | N2-Dy1-C27 | 95.50(9)   |
| Si3-N3           | 1.717(3) | N5-Dy1-C27 | 114.31(10) |
| Si3-C18          | 1.870(4) | N1-Si1-C29 | 113.49(17) |

|             |            |             |            |
|-------------|------------|-------------|------------|
| Si3-C20     | 1.866(4)   | N1-Si1-C28  | 110.85(17) |
| Si3-C19     | 1.863(4)   | N1-Si1-C30  | 110.09(16) |
| N3-C13      | 1.412(4)   | N2-Si2-C9   | 107.29(15) |
| N4-C11      | 1.491(4)   | N2-Si2-C8   | 111.68(16) |
| N4-C21      | 1.491(4)   | N2-Si2-C10  | 113.40(16) |
| N4-C1       | 1.491(4)   | N3-Si3-C18  | 111.23(16) |
| N1-C27      | 1.419(4)   | N3-Si3-C20  | 109.09(16) |
| N2-C3       | 1.416(4)   | N3-Si3-C19  | 114.02(17) |
| N5-C31      | 1.326(5)   | Si3-N3-Dy1  | 130.84(14) |
| N5-C35      | 1.287(6)   | C13-N3-Dy1  | 109.75(19) |
| C1-N4-Dy1   | 110.61(18) | C11-N4-Dy1  | 109.88(17) |
| Si1-N1-Dy1  | 135.42(14) | C21-N4-Dy1  | 108.21(18) |
| C27-N1-Dy1  | 107.4(2)   | Si2-N2-Dy1  | 129.61(14) |
| C3-N2-Dy1   | 111.05(19) | C31-N5-Dy1  | 122.5(3)   |
| C35-N5-Dy1  | 121.5(3)   | N1-C27-Dy1  | 45.79(14)  |
| C22-C27-Dy1 | 94.2(2)    | C26-C27-Dy1 | 129.3(2)   |

---

**Complex 3**

---

|         |            |            |            |
|---------|------------|------------|------------|
| Dy1-O1  | 2.1686(14) | N1-C13     | 1.407(3)   |
| Dy1-N4  | 2.5884(17) | O1-Dy1-N4  | 178.67(6)  |
| Dy1-N3  | 2.2720(17) | O1-Dy1-N3  | 100.50(6)  |
| Dy1-N2  | 2.2904(18) | O1-Dy1-N2  | 99.08(6)   |
| Dy1-N1  | 2.2684(17) | O1-Dy1-N1  | 97.71(6)   |
| Si2-N2  | 1.7208(18) | N3-Dy1-N4  | 80.82(6)   |
| Si1-N1  | 1.7188(18) | N3-Dy1-N2  | 118.06(6)  |
| Si3-N3  | 1.7150(19) | N2-Dy1-N4  | 80.46(6)   |
| Si2-C9  | 1.875(2)   | N1-Dy1-N4  | 81.50(6)   |
| Si2-C8  | 1.879(2)   | N1-Dy1-N3  | 113.35(6)  |
| Si2-C7  | 1.881(2)   | N1-Dy1-N2  | 121.23(6)  |
| Si1-C6  | 1.869(2)   | N2-Si2-C9  | 109.13(10) |
| Si1-C5  | 1.873(3)   | N2-Si2-C8  | 114.95(10) |
| Si1-C4  | 1.874(3)   | N2-Si2-C7  | 110.76(10) |
| Si3-C12 | 1.874(3)   | N1-Si1-C6  | 110.69(10) |
| Si3-C11 | 1.875(2)   | N1-Si1-C5  | 108.17(10) |
| Si3-C10 | 1.888(3)   | N1-Si1-C4  | 114.65(11) |
| O1-N5   | 1.378(2)   | N3-Si3-C12 | 109.15(10) |
| N4-C26  | 1.495(3)   | N3-Si3-C11 | 110.78(11) |
| N4-C19  | 1.495(3)   | N3-Si3-C10 | 113.45(11) |
| N4-C33  | 1.496(3)   | N5-O1-Dy1  | 175.81(13) |
| N5-C1   | 1.495(3)   | Si1-N1-Dy1 | 129.04(9)  |
| N5-C3   | 1.490(3)   | Si3-N3-Dy1 | 124.80(9)  |
| N5-C2   | 1.497(3)   | C33-N4-Dy1 | 110.98(12) |
| N3-C27  | 1.418(3)   | C13-N1-Dy1 | 109.08(12) |
| N2-C20  | 1.414(3)   | C27-N3-Dy1 | 114.34(13) |

---

**Table S3** Relaxation fitting parameters from least-squares fitting of  $\chi(f)$  data under 500 Oe dc field of **1**.

| $T(K)$ | $\chi_T$ | $\chi_s$ | $\alpha$ |
|--------|----------|----------|----------|
| 2      | 3.991    | 1.416    | 0.266    |
| 2.3    | 3.769    | 1.261    | 0.184    |
| 2.6    | 3.512    | 1.147    | 0.111    |
| 3      | 3.167    | 1.008    | 0.051    |
| 3.3    | 2.947    | 0.946    | 0.016    |
| 3.6    | 2.743    | 0.841    | 0.031    |
| 4      | 2.476    | 0.764    | 0.014    |
| 4.3    | 2.325    | 0.762    | 0.023    |
| 4.6    | 2.175    | 0.724    | 0.017    |
| 5      | 2.011    | 0.719    | 0.019    |
| 5.5    | 1.837    | 0.741    | 0.021    |
| 6      | 1.686    | 0.838    | 0.015    |

**Table S4** Relaxation fitting parameters from least-squares fitting of  $\chi(f)$  data under 500 Oe dc field of **2**.

| $T(K)$ | $\chi_T$ | $\chi_s$               | $\alpha$ |
|--------|----------|------------------------|----------|
| 2.6    | 3.278    | 0.510                  | 0.437    |
| 3      | 2.926    | 0.872                  | 0.338    |
| 3.3    | 2.692    | 1.110                  | 0.212    |
| 3.6    | 2.488    | 1.070                  | 0.160    |
| 4      | 2.244    | 1.012                  | 0.078    |
| 4.3    | 2.101    | 0.841                  | 0.109    |
| 4.6    | 1.967    | 0.675                  | 0.074    |
| 5      | 1.818    | 0.130                  | 0.106    |
| 5.5    | 1.659    | $2.24 \times 10^{-11}$ | 0.145    |
| 6      | 1.528    | $3.81 \times 10^{-11}$ | 0.231    |

**Table S5** Relaxation fitting parameters from least-squares fitting of  $\chi(f)$  data under 500 Oe dc field of **3**.

| $T(K)$ | $\chi_T$ | $\chi_s$ | $\alpha$ |
|--------|----------|----------|----------|
| 2      | 4.453    | 0.657    | 0.372    |
| 2.3    | 4.084    | 0.613    | 0.304    |
| 2.6    | 3.748    | 0.542    | 0.288    |
| 3      | 3.370    | 0.477    | 0.296    |
| 3.3    | 3.102    | 0.447    | 0.317    |
| 3.6    | 2.842    | 0.488    | 0.323    |
| 4      | 2.570    | 0.703    | 0.302    |
| 4.3    | 2.394    | 0.833    | 0.297    |
| 4.6    | 2.222    | 0.931    | 0.272    |
| 5      | 2.053    | 1.014    | 0.258    |
| 5.5    | 1.871    | 1.036    | 0.273    |
| 6      | 1.720    | 1.079    | 0.299    |

**Table S6** Calculated energy levels ( $\text{cm}^{-1}$ ),  $\mathbf{g}$  ( $g_x, g_y, g_z$ ) tensors and predominant  $m_J$  values of the lowest eight Kramers doublets (KDs) of complexes **1a**, **1b**, **2** and **3**, using CASSCF/RASSI-SO with OpenMolcas.

| KDs | <b>1a</b> |                          |            | <b>1b</b> |                          |                          |
|-----|-----------|--------------------------|------------|-----------|--------------------------|--------------------------|
|     | $E$       | $\mathbf{g}$             | $m_J$      | $E$       | $\mathbf{g}$             | $m_J$                    |
| 0   | 0.0       | 0.180<br>0.437<br>19.284 | $\pm 15/2$ | 0.0       | 0.124<br>0.279<br>19.410 | $\pm 15/2$               |
| 1   | 140.7     | 10.385<br>8.330<br>2.506 | $\pm 13/2$ | 160.7     | 1.945<br>4.763<br>13.550 | $\pm 13/2$               |
| 2   | 213.2     | 6.646<br>4.333<br>1.681  | $\pm 5/2$  | 246.3     | 7.781<br>5.448<br>2.258  | $\pm 9/2$                |
| 3   | 295.2     | 1.051<br>3.490<br>12.742 | $\pm 7/2$  | 334.2     | 0.263<br>3.509<br>10.837 | $\pm 5/2$                |
| 4   | 343.2     | 0.118<br>1.868<br>15.017 | $\pm 3/2$  | 378.0     | 0.607<br>1.546<br>17.046 | $\pm 1/2$                |
| 5   | 368.8     | 1.223<br>1.924<br>16.719 | $\pm 1/2$  | 396.3     | 1.595<br>2.182<br>15.897 | $\pm 3/2$                |
| 6   | 469.3     | 0.250<br>0.336<br>19.110 | $\pm 11/2$ | 534.5     | 0.185<br>0.467<br>18.461 | $\pm 11/2$               |
| 7   | 574.7     | 0.036<br>0.080<br>19.681 | $\pm 9/2$  | 579.6     | 0.166<br>0.610<br>19.073 | $\pm 7/2$                |
| KDs | <b>2</b>  |                          |            | <b>3</b>  |                          |                          |
|     | $E$       | $\mathbf{g}$             | $m_J$      | $E$       | $\mathbf{g}$             | $m_J$                    |
| 0   | 0.0       | 0.902<br>3.871<br>16.514 | $\pm 15/2$ | 0         | 0.0                      | 0.127<br>0.316<br>19.054 |
| 1   | 71.7      | 3.556<br>5.248<br>7.447  | $\pm 9/2$  | 1         | 83.8                     | 0.575<br>1.851<br>14.941 |
| 2   | 160.4     | 6.167<br>5.012<br>3.482  | $\pm 5/2$  | 2         | 112.2                    | 0.530<br>1.007<br>17.069 |

|   |       |                          |            |   |       |                          |
|---|-------|--------------------------|------------|---|-------|--------------------------|
| 3 | 260.7 | 1.859<br>4.121<br>11.939 | $\pm 11/2$ | 3 | 161.3 | 3.925<br>5.182<br>11.268 |
| 4 | 288.1 | 1.513<br>1.899<br>16.835 | $\pm 3/2$  | 4 | 203.0 | 1.533<br>2.297<br>13.292 |
| 5 | 393.1 | 0.334<br>1.754<br>17.172 | $\pm 1/2$  | 5 | 261.1 | 0.075<br>2.161<br>14.872 |
| 6 | 407.8 | 0.511<br>2.421<br>15.505 | $\pm 7/2$  | 6 | 274.6 | 0.529<br>2.279<br>14.878 |
| 7 | 419.0 | 0.174<br>1.224<br>17.290 | $\pm 13/2$ | 7 | 403.5 | 0.007<br>0.020<br>19.732 |

**Table S7** Wave functions with definite projection of the total moment  $|m_J\rangle$  for the lowest eight KDs of complexes **1a**, **1b**, **2** and **3** using CASSCF/RASSI-SO with OpenMolcas.

|           | states          | $E/\text{cm}^{-1}$ | wave functions                                                                                                                                        |
|-----------|-----------------|--------------------|-------------------------------------------------------------------------------------------------------------------------------------------------------|
| <b>1a</b> | KD <sub>0</sub> | 0.0                | 92.9% $ \pm 15/2\rangle$                                                                                                                              |
|           | KD <sub>1</sub> | 140.7              | 42.2% $ \pm 13/2\rangle$ +22.9% $ \pm 9/2\rangle$ +15.7% $ \pm 5/2\rangle$                                                                            |
|           | KD <sub>2</sub> | 213.2              | 19.5% $ \pm 13/2\rangle$ +27.1% $ \pm 11/2\rangle$ +27.7% $ \pm 7/2\rangle$ +11.2% $ \pm 3/2\rangle$                                                  |
|           | KD <sub>3</sub> | 295.2              | 20.8% $ \pm 13/2\rangle$ +22.9% $ \pm 5/2\rangle$ +24.9% $ \pm 3/2\rangle$ +12.6% $ \pm 1/2\rangle$ +9.6% $ \pm 11/2\rangle$                          |
|           | KD <sub>4</sub> | 343.2              | 11.1% $ \pm 13/2\rangle$ +20.8% $ \pm 11/2\rangle$ +23.2% $ \pm 9/2\rangle$ +27.2% $ \pm 1/2\rangle$ +6.8% $ \pm 7/2\rangle$ +6.7% $ \pm 3/2\rangle$  |
|           | KD <sub>5</sub> | 368.8              | 17.7% $ \pm 11/2\rangle$ +16.0% $ \pm 9/2\rangle$ +19.9% $ \pm 7/2\rangle$ +14.8% $ \pm 5/2\rangle$ +10.9% $ \pm 3/2\rangle$ +18.1% $ \pm 1/2\rangle$ |
|           | KD <sub>6</sub> | 469.3              | 13.8% $ \pm 11/2\rangle$ +19.5% $ \pm 9/2\rangle$ +18.4% $ \pm 7/2\rangle$ +18.7% $ \pm 5/2\rangle$ +19.1% $ \pm 3/2\rangle$ +7.2% $ \pm 1/2\rangle$  |
|           | KD <sub>7</sub> | 574.7              | 11.0% $ \pm 9/2\rangle$ +17.7% $ \pm 7/2\rangle$ +20.5% $ \pm 5/2\rangle$ +21.3% $ \pm 3/2\rangle$ +23.9% $ \pm 1/2\rangle$                           |
| <b>1b</b> | KD <sub>0</sub> | 0.0                | 94.0% $ \pm 15/2\rangle$                                                                                                                              |
|           | KD <sub>1</sub> | 160.7              | 54.6% $ \pm 13/2\rangle$ +19.9% $ \pm 9/2\rangle$ +11.1% $ \pm 5/2\rangle$                                                                            |
|           | KD <sub>2</sub> | 246.3              | 16.4% $ \pm 13/2\rangle$ +30.9% $ \pm 11/2\rangle$ +25.3% $ \pm 7/2\rangle$ +11.5% $ \pm 3/2\rangle$                                                  |
|           | KD <sub>3</sub> | 334.2              | 19.5% $ \pm 13/2\rangle$ +15.0% $ \pm 11/2\rangle$ +14.0% $ \pm 9/2\rangle$ +22.8% $ \pm 5/2\rangle$ +21.9% $ \pm 3/2\rangle$                         |
|           | KD <sub>4</sub> | 378.0              | 15.1% $ \pm 11/2\rangle$ +17.7% $ \pm 9/2\rangle$ +10.6% $ \pm 7/2\rangle$ +9.0% $ \pm 5/2\rangle$ +12.9% $ \pm 3/2\rangle$ +30.0% $ \pm 1/2\rangle$  |
|           | KD <sub>5</sub> | 396.3              | 17.9% $ \pm 11/2\rangle$ +20.0% $ \pm 9/2\rangle$ +20.9% $ \pm 7/2\rangle$ +10.0% $ \pm 5/2\rangle$ +22.5% $ \pm 1/2\rangle$                          |
|           | KD <sub>6</sub> | 534.5              | 10.4% $ \pm 11/2\rangle$ +13.8% $ \pm 9/2\rangle$ +11.6% $ \pm 7/2\rangle$ +20.4% $ \pm 5/2\rangle$ +29.2% $ \pm 3/2\rangle$ +12.2% $ \pm 1/2\rangle$ |
|           | KD <sub>7</sub> | 579.6              | 13.8% $ \pm 9/2\rangle$ +23.9% $ \pm 7/2\rangle$ +21.3% $ \pm 5/2\rangle$ +14.8% $ \pm 3/2\rangle$ +21.3% $ \pm 1/2\rangle$                           |
| <b>2</b>  | KD <sub>0</sub> | 0.0                | 70.8% $ \pm 15/2\rangle$ +12.1% $ \pm 11/2\rangle$ +9.2% $ \pm 7/2\rangle$                                                                            |
|           | KD <sub>1</sub> | 71.7               | 12.2% $ \pm 15/2\rangle$ +22.6% $ \pm 13/2\rangle$ +24.4% $ \pm 9/2\rangle$ +20.9% $ \pm 5/2\rangle$ +9.4% $ \pm 1/2\rangle$                          |
|           | KD <sub>2</sub> | 160.4              | 13.2% $ \pm 15/2\rangle$ +20.7% $ \pm 13/2\rangle$ +17.7% $ \pm 11/2\rangle$ +23.1% $ \pm 7/2\rangle$ +13.7% $ \pm 3/2\rangle$                        |
|           | KD <sub>3</sub> | 260.7              | 29.1% $ \pm 13/2\rangle$ +17.1% $ \pm 11/2\rangle$ +10.3% $ \pm 9/2\rangle$ +9.3% $ \pm 7/2\rangle$ +11.0% $ \pm 5/2\rangle$ +19.9% $ \pm 1/2\rangle$ |
|           | KD <sub>4</sub> | 288.1              | 21.8% $ \pm 5/2\rangle$ +29.3% $ \pm 3/2\rangle$ +22.0% $ \pm 1/2\rangle$ +9.0% $ \pm 7/2\rangle$                                                     |
|           | KD <sub>5</sub> | 393.1              | 12.2% $ \pm 9/2\rangle$ +17.1% $ \pm 7/2\rangle$ +22.1% $ \pm 5/2\rangle$ +19.5% $ \pm 3/2\rangle$ +24.2% $ \pm 1/2\rangle$                           |



|          |                 |       |                                                               |
|----------|-----------------|-------|---------------------------------------------------------------|
|          | KD <sub>6</sub> | 407.8 | 17.3% ±11/2>+15.8% ±9/2>+14.8% ±5/2>+22.3% ±3/2>+16.0% ±1/2>  |
|          | KD <sub>7</sub> | 419.0 | 11.9% ±13/2>+26.8% ±11/2>+24.2% ±9/2>+22.5% ±7/2>+6.9% ±5/2>  |
| <b>3</b> | KD <sub>0</sub> | 0.0   | 88.1% ±15/2>+8.4% ±11/2>                                      |
|          | KD <sub>1</sub> | 83.8  | 49.7% ±13/2>+21.0% ±9/2>+8.7% ±7/2>+6.3% ±11/2>               |
|          | KD <sub>2</sub> | 112.2 | 35.1% ±1/2>+29.5% ±3/2>+17.7% ±5/2>+5.8% ±13/2>               |
|          | KD <sub>3</sub> | 161.3 | 12.4% ±13/2>+21.5% ±11/2>+16.5% ±7/2>+19.1% ±3/2>+16.5% ±1/2> |
|          | KD <sub>4</sub> | 203.0 | 23.2% ±7/2>+34.4% ±5/2>+12.9% ±3/2>+8.7% ±9/2>+9.2% ±13/2>    |
|          | KD <sub>5</sub> | 261.0 | 12.8% ±13/2>+28.2% ±11/2>+25.2% ±9/2>+19.4% ±7/2>+8.7% ±5/2>  |
|          | KD <sub>6</sub> | 274.7 | 9.6% ±13/2>+23.5% ±11/2>+32.7% ±9/2>+16.1% ±7/2>+8.2% ±5/2>   |
|          | KD <sub>7</sub> | 403.5 | 11.0% ±7/2>+18.2% ±5/2>+27.7% ±3/2>+34.9% ±1/2>               |

**Table S8** Calculated crystal-field parameters  $B(k, q)$  and the corresponding weights for compounds **1a**, **1b**, **2** and **3** using CASSCF/RASSI-SO with OpenMolcas.

| <b>1a</b> |                          |                          |            | <b>1b</b> |                          |                          |            |
|-----------|--------------------------|--------------------------|------------|-----------|--------------------------|--------------------------|------------|
| $k$       | $q$                      | $B(k, q)$                | Weight (%) | $k$       | $q$                      | $B(k, q)$                | Weight (%) |
| 2         | -2                       | $-0.8059 \times 10^0$    | 5.89       | 2         | -2                       | $0.3451 \times 10^0$     | 2.58       |
|           | -1                       | $-0.4799 \times 10^{-1}$ | 0.35       |           | -1                       | $0.1266 \times 10^0$     | 0.95       |
|           | 0                        | $-0.1900 \times 10^1$    | 13.89      |           | 0                        | $-0.2173 \times 10^1$    | 16.23      |
|           | 1                        | $0.9764 \times 10^0$     | 7.14       |           | 1                        | $-0.9865 \times 10^0$    | 7.37       |
|           | 2                        | $0.1540 \times 10^1$     | 11.26      |           | 2                        | $0.1422 \times 10^1$     | 10.62      |
| 4         | -4                       | $0.4223 \times 10^{-4}$  | 0.05       | 4         | -4                       | $0.6635 \times 10^{-4}$  | 0.08       |
|           | -3                       | $-0.2564 \times 10^{-3}$ | 0.34       |           | -3                       | $-0.3541 \times 10^{-3}$ | 0.48       |
|           | -2                       | $0.2679 \times 10^{-2}$  | 3.55       |           | -2                       | $-0.1019 \times 10^{-2}$ | 1.38       |
|           | -1                       | $0.3140 \times 10^{-3}$  | 0.41       |           | -1                       | $-0.4204 \times 10^{-3}$ | 0.56       |
|           | 0                        | $-0.4347 \times 10^{-2}$ | 5.76       |           | 0                        | $-0.4542 \times 10^{-2}$ | 6.15       |
|           | 1                        | $-0.4345 \times 10^{-2}$ | 5.76       |           | 1                        | $0.4517 \times 10^{-2}$  | 6.12       |
|           | 2                        | $0.5615 \times 10^{-2}$  | 7.44       |           | 2                        | $0.5926 \times 10^{-2}$  | 8.03       |
|           | 3                        | $-0.3294 \times 10^{-2}$ | 4.36       |           | 3                        | $0.3513 \times 10^{-2}$  | 4.76       |
| 6         | 4                        | $-0.8820 \times 10^{-2}$ | 11.70      | 4         | $-0.9211 \times 10^{-2}$ | 12.48                    |            |
|           | -6                       | $0.1678 \times 10^{-4}$  | 2.08       | 6         | -6                       | $-0.9665 \times 10^{-5}$ | 1.22       |
|           | -5                       | $0.3630 \times 10^{-5}$  | 0.45       |           | -5                       | $0.1843 \times 10^{-5}$  | 0.23       |
|           | -4                       | $0.4637 \times 10^{-5}$  | 0.57       |           | -4                       | $-0.1155 \times 10^{-5}$ | 0.14       |
|           | -3                       | $-0.1048 \times 10^{-5}$ | 0.13       |           | -3                       | $-0.1020 \times 10^{-4}$ | 1.29       |
|           | -2                       | $-0.8241 \times 10^{-5}$ | 1.02       |           | -2                       | $0.4034 \times 10^{-5}$  | 0.51       |
|           | -1                       | $-0.6025 \times 10^{-5}$ | 0.74       |           | -1                       | $-0.1394 \times 10^{-4}$ | 1.77       |
|           | 0                        | $-0.1555 \times 10^{-4}$ | 1.93       |           | 0                        | $-0.1150 \times 10^{-4}$ | 1.46       |
|           | 1                        | $0.1437 \times 10^{-4}$  | 1.78       |           | 1                        | $-0.1550 \times 10^{-4}$ | 1.97       |
|           | 2                        | $-0.1195 \times 10^{-4}$ | 1.48       |           | 2                        | $-0.9078 \times 10^{-5}$ | 1.15       |
|           | 3                        | $0.1034 \times 10^{-4}$  | 1.28       |           | 3                        | $-0.1115 \times 10^{-4}$ | 1.41       |
|           | 4                        | $-0.2470 \times 10^{-4}$ | 3.07       |           | 4                        | $-0.2328 \times 10^{-4}$ | 2.96       |
| 5         | $-0.2602 \times 10^{-4}$ | 3.23                     | 5          |           | $0.2755 \times 10^{-4}$  | 3.50                     |            |

|          |                          |                                  |            |                          |          |                                  |            |
|----------|--------------------------|----------------------------------|------------|--------------------------|----------|----------------------------------|------------|
|          | 6                        | $0.2290 \times 10^{-4}$          | 2.84       |                          | 6        | $0.2373 \times 10^{-4}$          | 3.01       |
| <b>2</b> |                          |                                  |            | <b>3</b>                 |          |                                  |            |
| <i>k</i> | <i>q</i>                 | <i>B</i> ( <i>k</i> , <i>q</i> ) | Weight (%) | <i>k</i>                 | <i>q</i> | <i>B</i> ( <i>k</i> , <i>q</i> ) | Weight (%) |
| 2        | -2                       | $-0.1223 \times 10^0$            | 1.03       | 2                        | -2       | $0.7437 \times 10^0$             | 7.65       |
|          | -1                       | $0.8921 \times 10^{-1}$          | 0.75       |                          | -1       | $0.2953 \times 10^0$             | 3.04       |
|          | 0                        | $-0.1188 \times 10^1$            | 9.96       |                          | 0        | $-0.1055 \times 10^1$            | 10.86      |
|          | 1                        | $0.2054 \times 10^0$             | 1.72       |                          | 1        | $0.1601 \times 10^0$             | 1.64       |
|          | 2                        | $0.1917 \times 10^1$             | 16.07      |                          | 2        | $0.7596 \times 10^{-1}$          | 0.78       |
| 4        | -4                       | $-0.8416 \times 10^{-3}$         | 1.28       | 4                        | -4       | $-0.9016 \times 10^{-3}$         | 1.68       |
|          | -3                       | $0.2079 \times 10^{-3}$          | 0.31       |                          | -3       | $-0.3429 \times 10^{-3}$         | 0.64       |
|          | -2                       | $-0.2304 \times 10^{-2}$         | 3.50       |                          | -2       | $-0.6220 \times 10^{-2}$         | 11.62      |
|          | -1                       | $-0.1594 \times 10^{-3}$         | 0.24       |                          | -1       | $-0.1420 \times 10^{-2}$         | 2.65       |
|          | 0                        | $-0.3845 \times 10^{-2}$         | 5.84       |                          | 0        | $-0.2959 \times 10^{-2}$         | 5.52       |
|          | 1                        | $0.2602 \times 10^{-2}$          | 3.95       |                          | 1        | $-0.5365 \times 10^{-3}$         | 1.00       |
|          | 2                        | $0.6851 \times 10^{-2}$          | 10.42      |                          | 2        | $0.6164 \times 10^{-2}$          | 11.51      |
|          | 3                        | $0.4256 \times 10^{-2}$          | 6.47       |                          | 3        | $-0.1279 \times 10^{-2}$         | 2.39       |
| 4        | $-0.9098 \times 10^{-2}$ | 13.84                            | 4          | $-0.7803 \times 10^{-2}$ | 14.58    |                                  |            |
| 6        | -6                       | $-0.6745 \times 10^{-5}$         | 0.96       | 6                        | -6       | $-0.1792 \times 10^{-4}$         | 3.14       |
|          | -5                       | $-0.3191 \times 10^{-5}$         | 0.45       |                          | -5       | $-0.4628 \times 10^{-5}$         | 0.81       |
|          | -4                       | $-0.1238 \times 10^{-4}$         | 1.76       |                          | -4       | $-0.1221 \times 10^{-4}$         | 2.13       |
|          | -3                       | $0.3479 \times 10^{-5}$          | 0.49       |                          | -3       | $-0.1663 \times 10^{-4}$         | 2.91       |
|          | -2                       | $0.1096 \times 10^{-4}$          | 1.56       |                          | -2       | $0.1842 \times 10^{-4}$          | 3.22       |
|          | -1                       | $0.2523 \times 10^{-5}$          | 0.35       |                          | -1       | $-0.2215 \times 10^{-4}$         | 3.88       |
|          | 0                        | $-0.2138 \times 10^{-4}$         | 3.05       |                          | 0        | $-0.7196 \times 10^{-5}$         | 1.26       |
|          | 1                        | $-0.2162 \times 10^{-4}$         | 3.08       |                          | 1        | $0.5511 \times 10^{-5}$          | 0.96       |
|          | 2                        | $-0.6993 \times 10^{-5}$         | 0.99       |                          | 2        | $0.2163 \times 10^{-5}$          | 0.37       |
|          | 3                        | $0.9557 \times 10^{-6}$          | 0.13       |                          | 3        | $0.5988 \times 10^{-6}$          | 0.10       |
|          | 4                        | $-0.2889 \times 10^{-4}$         | 4.12       |                          | 4        | $-0.7199 \times 10^{-5}$         | 1.26       |
|          | 5                        | $0.1705 \times 10^{-4}$          | 2.43       |                          | 5        | $-0.4380 \times 10^{-5}$         | 0.76       |
| 6        | $0.2344 \times 10^{-4}$  | 3.34                             | 6          | $0.1066 \times 10^{-4}$  | 1.86     |                                  |            |

**Table S9** Continuous Shape Measures (*CShM*) calculations for complexes **1-3**.

|                 | Structure   | PP-5   | vOC-5 | TBPY-5 | SPY-5 | JTBPY-5 |
|-----------------|-------------|--------|-------|--------|-------|---------|
| <b>1 (Dy01)</b> | <b>CShM</b> | 34.261 | 5.781 | 0.835  | 4.306 | 2.207   |
| <b>1 (Dy02)</b> | <b>CShM</b> | 34.407 | 5.892 | 0.890  | 4.412 | 2.185   |
| <b>2</b>        | <b>CShM</b> | 35.542 | 7.113 | 0.737  | 5.250 | 1.735   |
| <b>3</b>        | <b>CShM</b> | 35.217 | 6.537 | 0.531  | 5.027 | 2.512   |

PP-5 Pentagon ( $D_{5h}$ )

vOC-5 Vacant octahedron ( $C_{4v}$ )

TBPY-5 Trigonal bipyramid ( $D_{3h}$ )

SPY-5 Spherical square pyramid ( $C_{4v}$ )

JTBPY-5 Johnson trigonal bipyramid J12 ( $D_{3h}$ )

**Table S10** Crystal field parameters for **1-3** fitted from magnetic data.

|               | $B_0^2$ | $B_0^4$ | $B_2^4$ | $B_0^6$ |
|---------------|---------|---------|---------|---------|
| <b>1(Dy1)</b> | 301     | -16     | 208     | 52      |
| <b>2</b>      | 187     | 37      | 44      | 38      |
| <b>3</b>      | 79      | 56      | 221     | 283     |

**Table S11** Energy levels and  $g$  for **1-3** fitted from magnetic data.

| KDs | <b>1(Dy1)</b>      |         | <b>2</b>           |         | <b>3</b>           |         |
|-----|--------------------|---------|--------------------|---------|--------------------|---------|
|     | $E/\text{cm}^{-1}$ | $g$     | $E/\text{cm}^{-1}$ | $g$     | $E/\text{cm}^{-1}$ | $g$     |
| 1   | 0                  | 0.0000  | 0                  | 0.0000  | 0                  | 0.0004  |
|     |                    | 0.0000  |                    | 0.0000  |                    | 0.0066  |
|     |                    | 19.7734 |                    | 18.8536 |                    | 19.0064 |
| 2   | 128                | 0.0000  | 91                 | 0.0000  | 107                | 0.6460  |
|     |                    | 0.0000  |                    | 0.0000  |                    | 2.4864  |
|     |                    | 17.2346 |                    | 15.9878 |                    | 17.1728 |

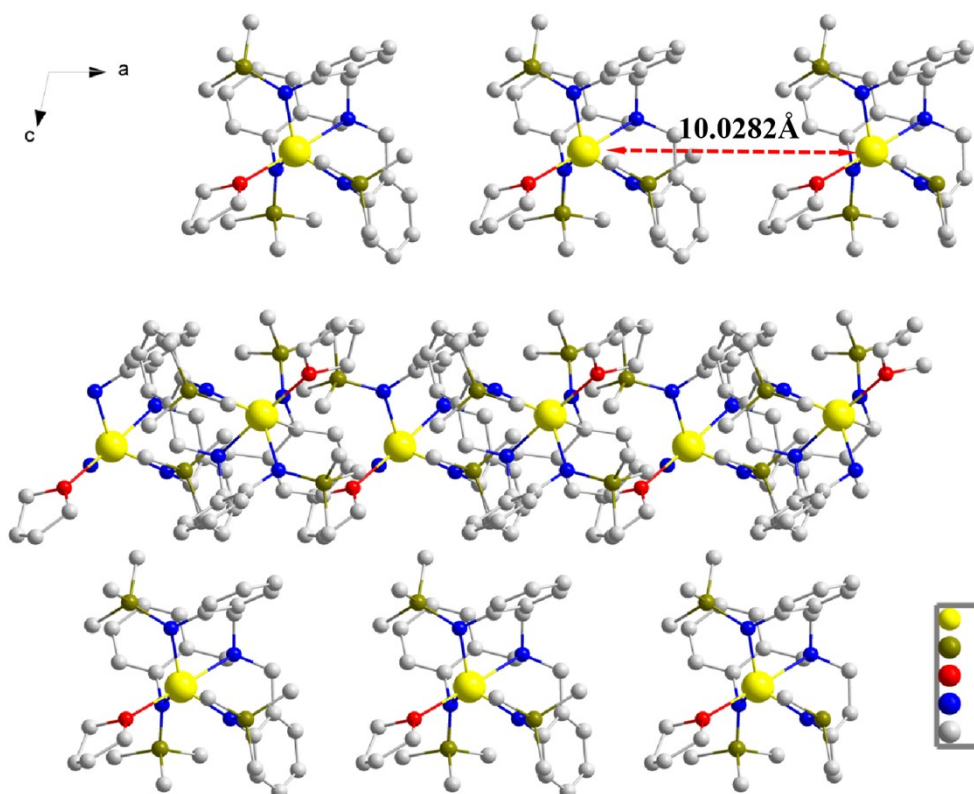**Fig. S1** Packing arrangement of **1** along the crystallographic  $b$  axis.

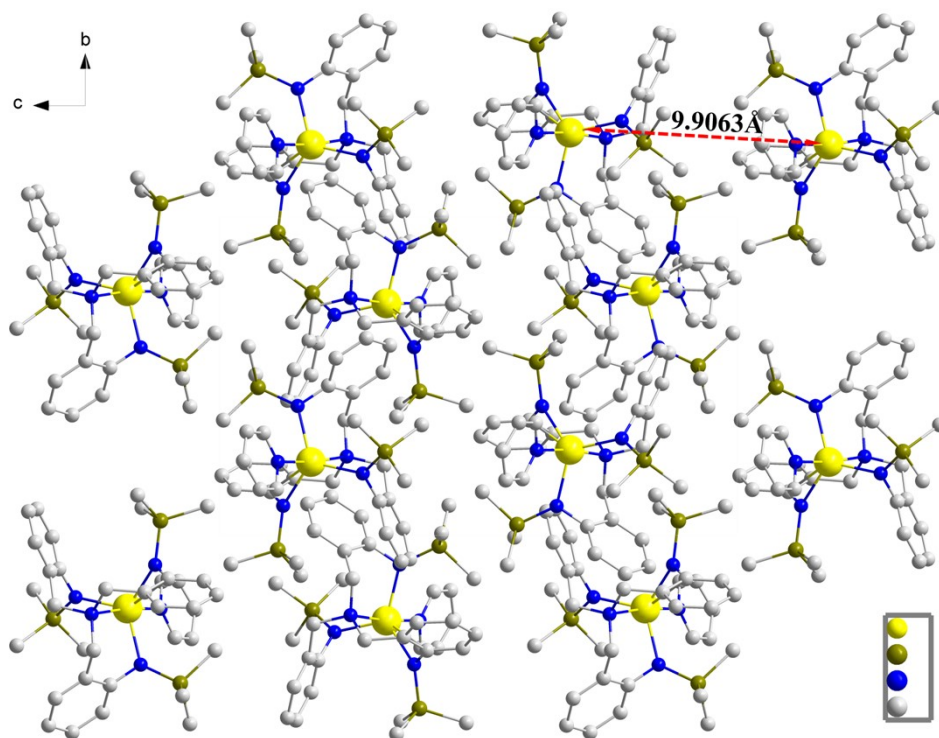

**Fig. S2** Packing arrangement of **2** along the crystallographic *a* axis.

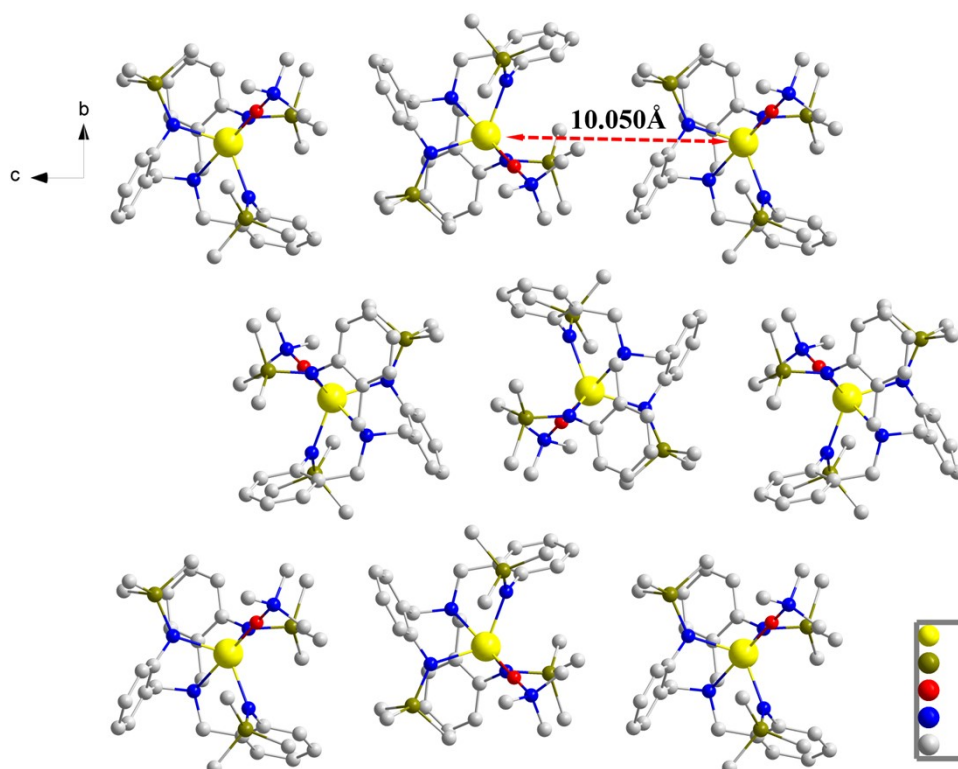

**Fig. S3** Packing arrangement of **3** along the crystallographic *a* axis.

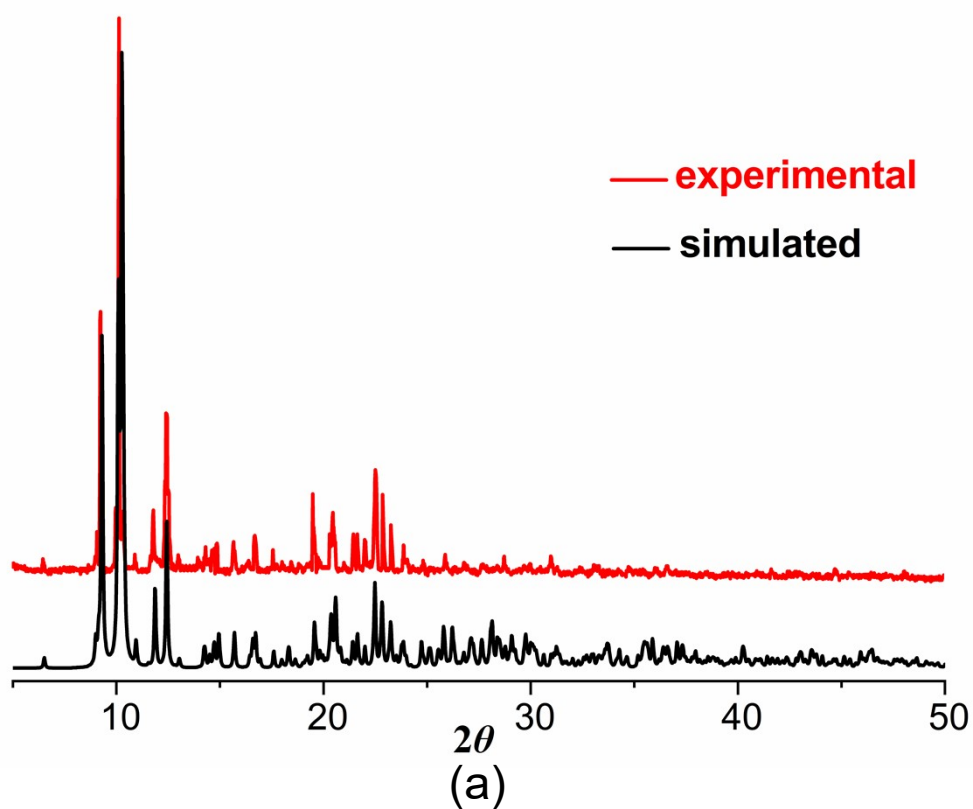

Fig. S4 PXRd patterns for complex 1.

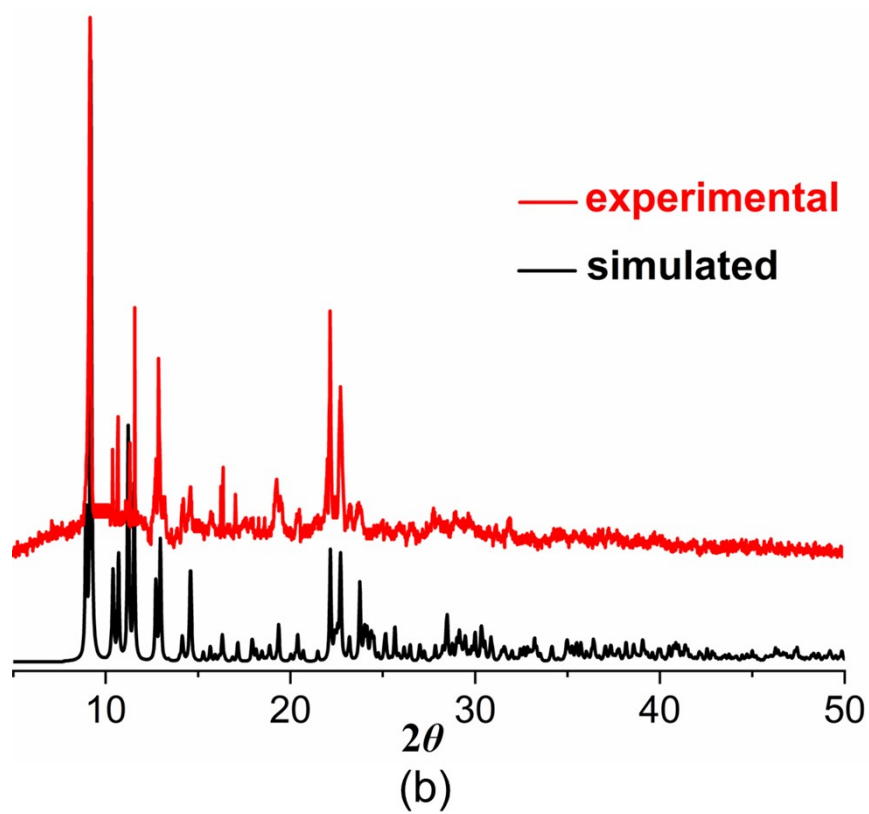

Fig. S5 PXRd patterns for complex 2.

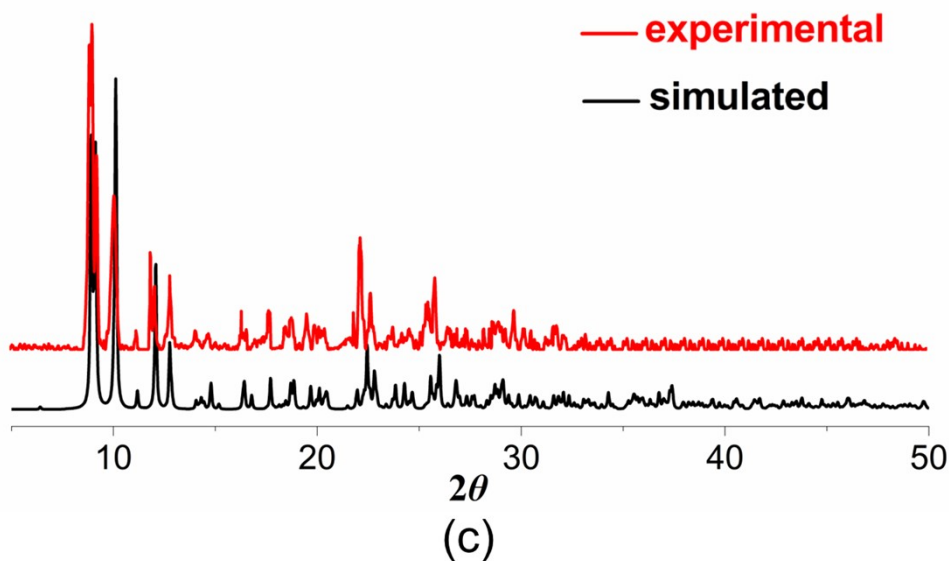

**Fig. S6** PXR D patterns for complex 3.

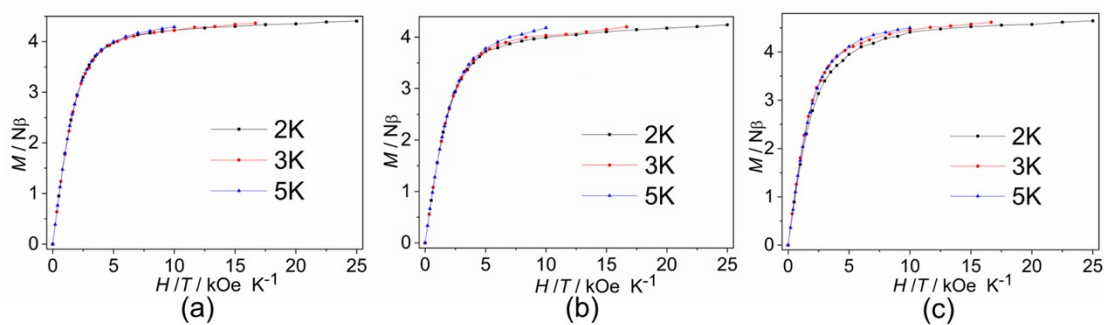

**Fig. S7** Plots of  $M$  vs.  $H/T$  for 1-3 at different temperature.

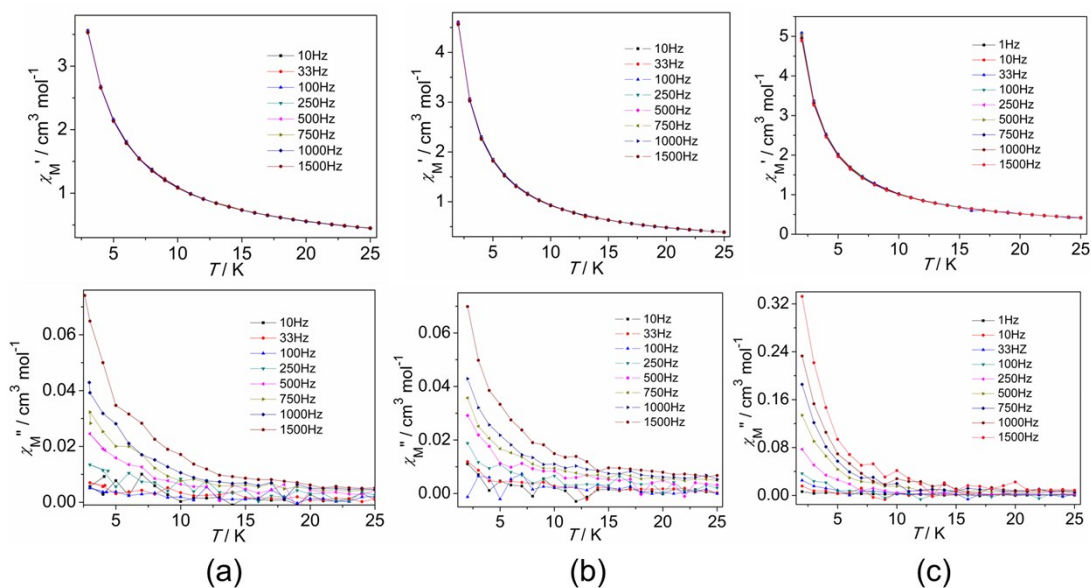

**Fig. S8** Temperature dependence of the in-phase (top) and out (bottom) ac susceptibilities at different frequencies without a dc field for complexes 1-3.

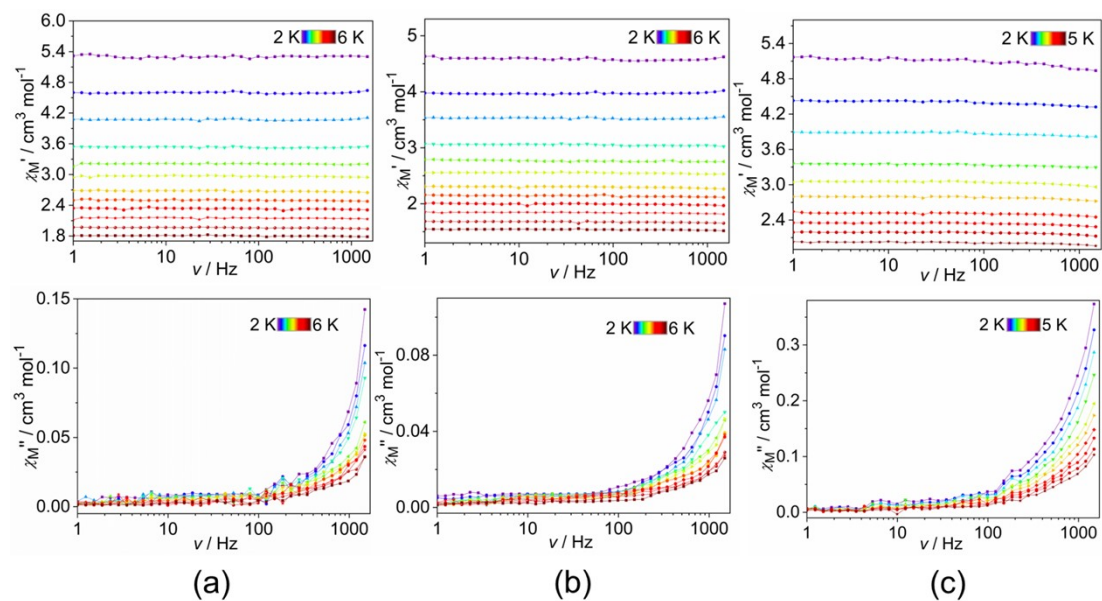

**Fig. S9** Frequency dependence of the in-phase (top) and out (bottom) ac susceptibilities at different frequencies without a dc field for complexes **1-3**.

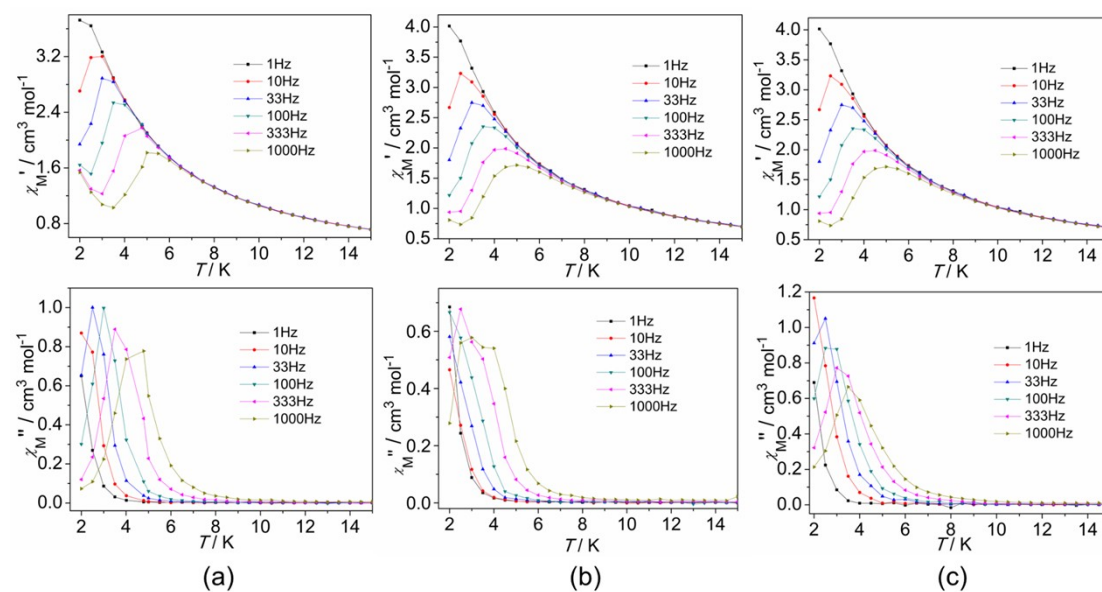

**Fig. S10** Temperature dependence of the in-phase (top) and out-of-phase (bottom) ac susceptibilities at different frequencies with a dc field of 500 Oe for complexes **1** (a, a'), **2** (b, b') and **3** (c, c').

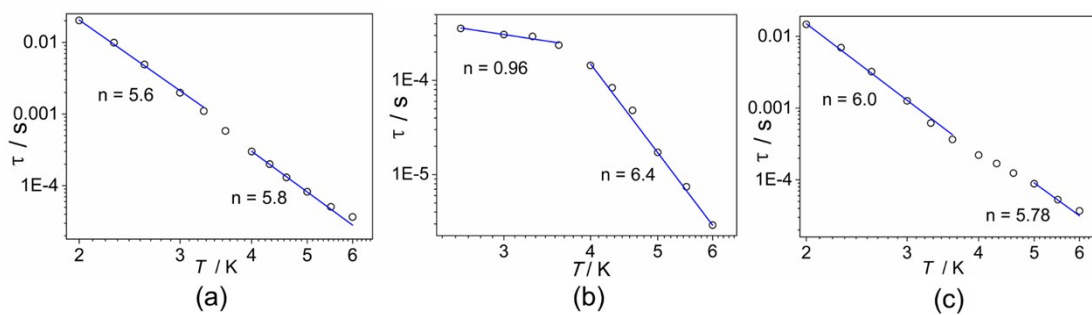

**Fig. S11** Temperature dependent relaxation times of **1** (a), **2** (b) and **3** (c) (log-log scale) under a 500Oe dc field. The lines were fitted to the equation of  $\tau = T^{-n}$  to give  $n$  values.

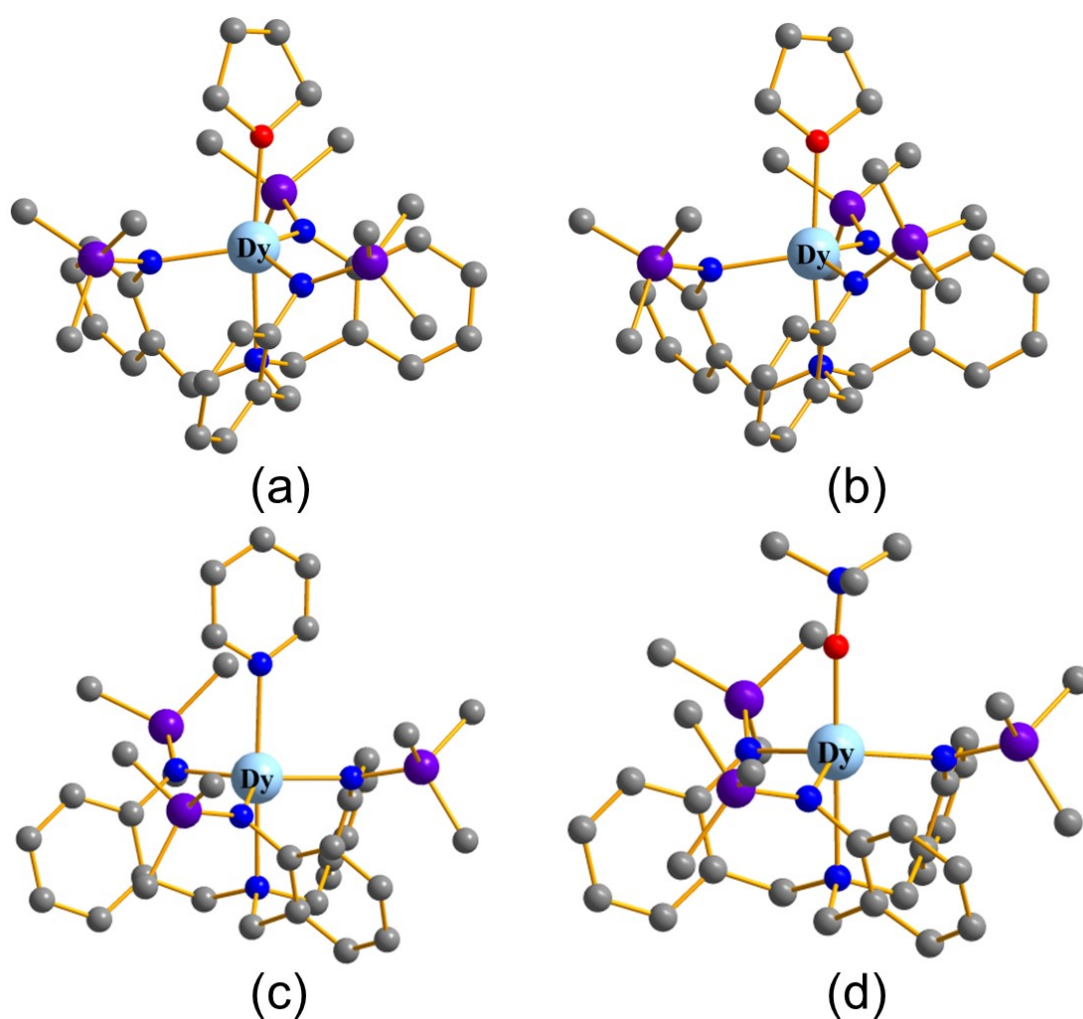

**Fig. S12** Calculated molecular structures of complexes **1a** (a), **1b** (b), **2** (c) and **3** (d); H atoms are omitted for clarify.



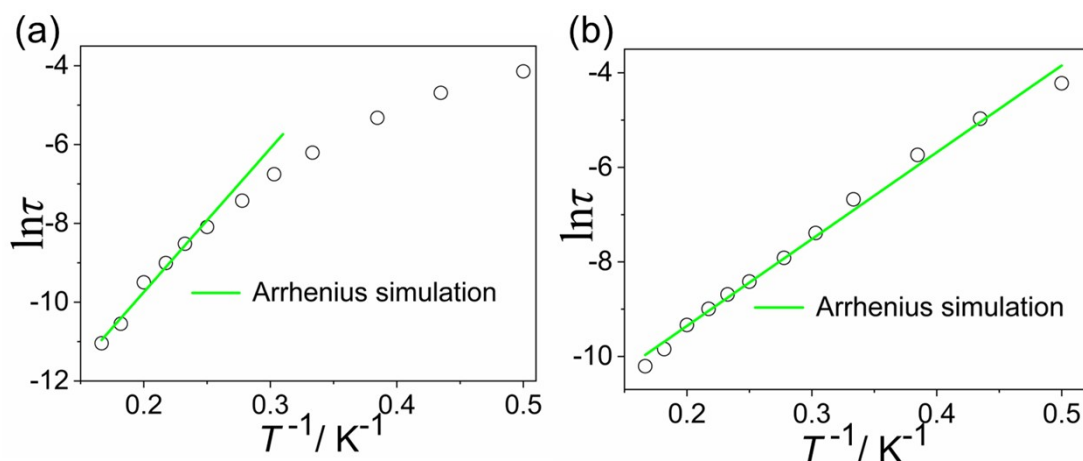

**Fig. S13** Magnetization relaxation time,  $\ln \tau$  vs.  $T^{-1}$  plot under 500 Oe dc field for **1** (a), **3** (b). The green line represents the Arrhenius fit.

## References

- S1 Galván, I. F.; Vacher, M.; Alavi, A.; Angeli, C.; Aquilante, F.; Autschbach, J.; Bao, J. J.; Bokarev, S. I.; Bogdanov, N. A.; Carlson, R. K.; Chibotaru, L. F.; Creutzberg, J.; Dattani, N.; Delcey, M. G.; Dong, S. S.; Dreuw, A.; Freitag, L.; Frutos, L. M.; Gagliardi, L.; Gendron, F.; Giussani, A.; González, L.; Grell, G.; Guo, M. Y.; Hoyer, C. E.; Johansson, M.; Keller, S.; Knecht, S.; Kovacevic, G.; Källman, E.; Manni, G. L.; Lundberg, M.; Ma, Y. J.; Mai, S.; Malhado, J. P.; Malmqvist, P. Å.; Marquetand, P.; Mewes, S. A.; Norell, J.; Olivucci, M.; Oppel, M.; Phung, Q. M.; Pierloot, K.; Plasser, F.; Reiher, M.; Sand, A. M.; Schapiro, I.; Sharma, P.; Stein, C. J.; Sørensen, L. K.; Truhlar, D. G.; Ugandi, M.; Ungur, L.; Valentini, A.; Vancoillie, S.; Veryazov, V.; Weser, O.; Woźniowski, T. A.; Widmark, Per-Olof.; Wouters, S.; Zech, A.; Zobel, J. P.; Lindh, R. *J. Chem. Theory Comput.* **2019**, *15*, 5925-5964.
- S2 Malmqvist, P. Å.; Roos, B. O.; Schimmelpfennig, B. *Chem. Phys. Lett.* **2002**, *357*, 230-240.
- S3 Heß, B. A.; Marian, C. M.; Wahlgren, U.; Gropen, O. *Chem. Phys. Lett.* **1996**, *251*, 365-371.
- S4 Chibotaru, L. F.; Ungur, L.; Soncini, A. *Angew. Chem., Int. Ed.* **2008**, *47*, 4126-4129.
- S5 Ungur, L.; Van den Heuvel, W.; Chibotaru, L. F. *New J. Chem.* **2009**, *33*, 1224-1230.
- S6 Chibotaru, L. F.; Ungur, L.; Aronica, C.; Elmoll, H.; Pilet, G.; Luneau, D. *J. Am. Chem. Soc.* **2008**, *130*, 12445-12455.
